# Supplementary material for: RNA-Seq-Based TCR Profiling Reveals Persistently Increased Intratumoral Clonality in Responders to Anti-PD-1 Therapy
Source: PubMed Central journal article supplement (PMC7199218; doi:10.3389/fonc.2020.00385), 2020-04-28
Supplement: Table_1.pdf [file Table_1.pdf]

**Supplementary Table 1.** Analyzed RNA-Seq samples from tumour-infiltrating CD4<sup>+</sup> and CD8<sup>+</sup> T cells reported in Ref: (Markowitz et al., 2018).

| sample | sample ID,<br>CD8 T cells | sample ID,<br>CD4 T cells | treatment | tumour<br>growth | day of<br>tumour<br>excision | time<br>point |
|--------|---------------------------|---------------------------|-----------|------------------|------------------------------|---------------|
| 24_7   | SRR7145378                | SRR7145347                | anti-PD-1 | progressing      | 24                           | late          |
| 24_6   | SRR7145377                | SRR7145346                | anti-PD-1 | progressing      | 24                           | late          |
| 17_5   | SRR7145376                | SRR7145345                | anti-PD-1 | progressing      | 17                           | late          |
| 17_1   | SRR7145375                | SRR7145344                | anti-PD-1 | progressing      | 17                           | late          |
| 24_8   | SRR7145374                | SRR7145343                | anti-PD-1 | regressing       | 24                           | late          |
| 24_5   | SRR7145373                | SRR7145342                | anti-PD-1 | regressing       | 24                           | late          |
| 24_3   | SRR7145372                | SRR7145341                | anti-PD-1 | regressing       | 24                           | late          |
| 24_4   | SRR7145371                | SRR7145340                | anti-PD-1 | regressing       | 24                           | late          |
| 24_2   | SRR7145370                | SRR7145339                | anti-PD-1 | regressing       | 24                           | late          |
| 24_1   | SRR7145369                | SRR7145338                | anti-PD-1 | regressing       | 24                           | late          |
| 17_8   | SRR7145368                | SRR7145337                | anti-PD-1 | regressing       | 17                           | late          |
| 17_7   | SRR7145367                | SRR7145336                | anti-PD-1 | regressing       | 17                           | late          |
| 17_6   | SRR7145366                | SRR7145335                | anti-PD-1 | regressing       | 17                           | late          |
| 17_4   | SRR7145365                | SRR7145334                | anti-PD-1 | regressing       | 17                           | late          |
| 17_3   | SRR7145364                | SRR7145333                | anti-PD-1 | regressing       | 17                           | late          |
| 14P_3  | SRR7145363                | SRR7145332                | anti-PD-1 | progressing      | 14                           | early         |
| 14P_2  | SRR7145362                | SRR7145331                | anti-PD-1 | progressing      | 14                           | early         |
| 14P_8  | SRR7145361                | SRR7145330                | anti-PD-1 | progressing      | 14                           | early         |
| 14P_7  | SRR7145360                | SRR7145329                | anti-PD-1 | progressing      | 14                           | early         |
| 14P_6  | SRR7145359                | SRR7145328                | anti-PD-1 | regressing       | 14                           | early         |
| 14P_5  | SRR7145358                | SRR7145327                | anti-PD-1 | regressing       | 14                           | early         |
| 14P_4  | SRR7145357                | SRR7145326                | anti-PD-1 | regressing       | 14                           | early         |
| 14P_1  | SRR7145356                | SRR7145325                | anti-PD-1 | regressing       | 14                           | early         |
| 14I_8  | SRR7145355                | SRR7145324                | IgG2a     | progressing      | 14                           | control       |
| 14I_7  | SRR7145354                | SRR7145323                | IgG2a     | progressing      | 14                           | control       |
| 14I_6  | SRR7145353                | SRR7145322                | IgG2a     | progressing      | 14                           | control       |
| 14I_5  | SRR7145352                | SRR7145321                | IgG2a     | progressing      | 14                           | control       |
| 14I_4  | SRR7145351                | SRR7145320                | IgG2a     | progressing      | 14                           | control       |
| 14I_3  | SRR7145350                | SRR7145319                | IgG2a     | progressing      | 14                           | control       |
| 14I_2  | SRR7145349                | SRR7145318                | IgG2a     | progressing      | 14                           | control       |
| 14I_1  | SRR7145348                | SRR7145317                | IgG2a     | progressing      | 14                           | control       |

**Reference:**

Markowitz, G.J., Havel, L.S., Crowley, M.J., Ban, Y., Lee, S.B., Thalappillil, J.S., Narula, N., Bhinder, B., Elemento, O., Wong, S.T., Gao, D., Altorki, N.K., and Mittal, V. (2018). Immune reprogramming via PD-1 inhibition enhances early-stage lung cancer survival. *JCI Insight* 3.
